# Supplementary material for: β Cell function after Roux-en-Y gastric bypass surgery or reduced energy intake alone in people with obesity
Source: JCI journal article supplement (doi:10.1172/jci.insight.170307), 2023-05-11
Supplement: sd1 [file 1]

## Online Supplemental Material

### Beta-cell function after Roux-en-Y gastric bypass or reduced energy intake alone in people with obesity

Bettina Mittendorfer, Bruce W. Patterson, Faidon Magkos, Mihoko Yoshino, David P. Bradley, J. Christopher Eagon, Samuel Klein

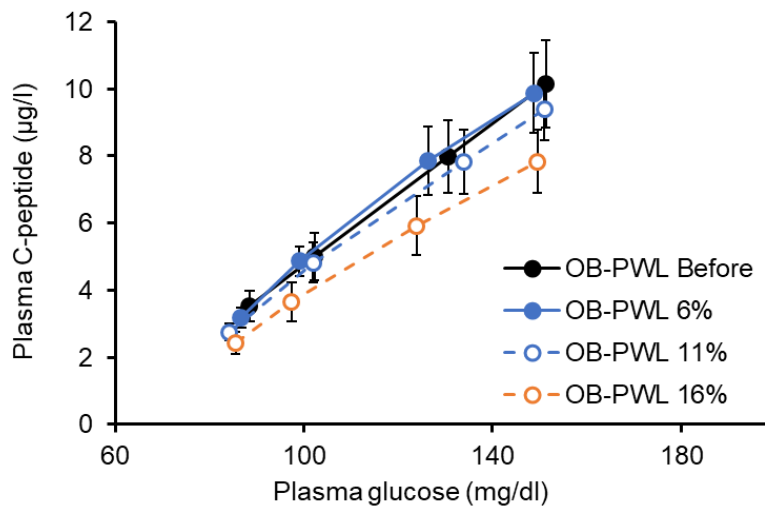

**Supplemental Figure 1.** Relationship between plasma C-peptide concentration and plasma glucose concentration before and during the first 30 minutes after ingesting 75 grams of glucose before and after progressive 6%, 11%, and 16% weight loss induced by a low-calorie diet. *Abbreviations:* OB, obese; PWL, progressive weight loss. Data are expressed as mean  $\pm$  SEM; n = 9.
